# Supplementary material for: Comparative Analysis of Chemical Descriptors by Machine Learning Reveals Atomistic Insights into Solute–Lipid Interactions
Source: PubMed Central journal article supplement (PMC11220795; doi:10.1021/acs.molpharmaceut.4c00080), 2024-05-23
Supplement: mp4c00080_si_001.pdf [file mp4c00080_si_001.pdf]

# Supporting Information:

## Comparative Analysis of Chemical Descriptors by Machine Learning Reveals Atomistic Insights into Solute-Lipid Interactions

Justus Johann Lange,<sup>†</sup> Andrea Anelli,<sup>‡</sup> Jochem Alsenz,<sup>¶</sup> Martin Kuentz,<sup>§</sup> Patrick  
J. O'Dwyer,<sup>†</sup> Wiebke Saal,<sup>‡</sup> Nicole Wyttenbach,<sup>‡</sup> and Brendan T. Griffin<sup>\*,†</sup>

<sup>†</sup>*School of Pharmacy, University College Cork, College Road, Cork, T12 R229, Cork  
County, Ireland*

<sup>‡</sup>*Roche Pharma Research and Early Development, Therapeutic Modalities, Roche  
Innovation Center Basel, F. Hoffmann-La Roche Ltd., Grenzacherstrasse 124, 4070 Basel,  
Switzerland*

<sup>¶</sup>*Independent Researcher, Grenzach-Wyhlen, 79639, Baden-Wuerttemberg, Germany*

<sup>§</sup>*Institute of Pharma Technology, University of Applied Sciences and Arts Northwestern  
Switzerland, Hofackerstrasse 30, Muttenz, CH-4231, Basel City, Switzerland*

E-mail: [brendan.griffin@ucc.ie](mailto:brendan.griffin@ucc.ie)

Phone: +353 (0) 21 490 1657. Fax: +353 (0) 21 490 1656

# Supporting Information Available

## Model Information Table

Table S1 provides an overview on the derived models and their hyperparameters, which were determined by 10-fold cross-validation on the training set. Non-specified hyperparameters were set to default values.

Table S1: Model information table detailing the parameters of the best model for each descriptor set. Remaining parameters were set to default values.

| Feature | Preprocessing    |                | Model parameters |          |           |          |
|---------|------------------|----------------|------------------|----------|-----------|----------|
|         | Transformer      | Scaling        | Algorithm        | $\alpha$ | Selection | L1 ratio |
| 2D&3D   | n.a.             | MinMaxScaler   | ElasticNet       | 0.012    | cyclic    | 0.75     |
| SOAPS   | n.a.             | StandardScaler | Lasso            | 0.029    | cyclic    | n.a.     |
| Abraham | PowerTransformer | MinMaxScaler   | Ridge            | 0.494    | n.a.      | n.a.     |
| ECFP4   | n.a.             | n.a.           | ElasticNet       | 0.029    | cyclic    | 0.25     |

## Descriptor Explanation

Table S2 provides an overview on the 15 most influential features for solubility in medium chain triglycerides as determined by the model based on 2D&3D descriptors.

Table S2: Full name and underlying research articles for the 2&3D descriptors calculated by *Mordred*.

| Feature     | Full name                                                                                                     | Reference                                                   |
|-------------|---------------------------------------------------------------------------------------------------------------|-------------------------------------------------------------|
| TopoPSA     | Topological Polar Surface Area                                                                                | Ertl <sup>S1</sup>                                          |
| EState_VSA3 | Surface contribution to the Electro-Topological State                                                         | Hall and Kier <sup>S2</sup>                                 |
| n5aRing     | 5-membered aromatic ring count                                                                                | Moriwaki et al. <sup>S3</sup>                               |
| Diameter    | Topological Diameter                                                                                          | Moriwaki et al. <sup>S3</sup>                               |
| BCUTc-11    | Burden Chemical Abstract Service University of Texas                                                          | Pearlman and Smith <sup>S4</sup>                            |
| EState_VSA9 | Surface contribution to the Electro-Topological State                                                         | Hall and Kier <sup>S2</sup>                                 |
| nHBDdon     | Number of hydrogen bond donors                                                                                | Moriwaki et al. <sup>S3</sup>                               |
| NsCH3       | Number of sCH3                                                                                                | Moriwaki et al. <sup>S3</sup>                               |
| TopoPSA(NO) | Topological Polar Surface Area (Accounting for Nitrogen and Oxygen only)                                      | Ertl <sup>S1</sup>                                          |
| GATS2Z      | Geary coefficient of lag 2 weighted by atomic number                                                          | Described on p.19 in Todeschini and Consonni <sup>S5</sup>  |
| nBondsD     | Number of double bonds in non-kekulized structure                                                             | Moriwaki et al. <sup>S3</sup>                               |
| PEOE_VSA8   | Sum of atomic van der Waals surface area contributions to partial equalization of orbital electronegativities | Gasteiger and Marsili <sup>S6</sup><br>Labute <sup>S7</sup> |
| SlogP_VSA1  | Sum of atomic van der Waals surface area associated with logP                                                 | Labute <sup>S7</sup>                                        |
| VSA_EState9 | Surface contribution to the Electro-Topological State                                                         | Hall and Kier <sup>S2</sup>                                 |

## Uncertainty & Applicability Domain Estimation

Figure S1 provides structural information for the five molecules exhibiting the highest uncertainty per descriptor/model.

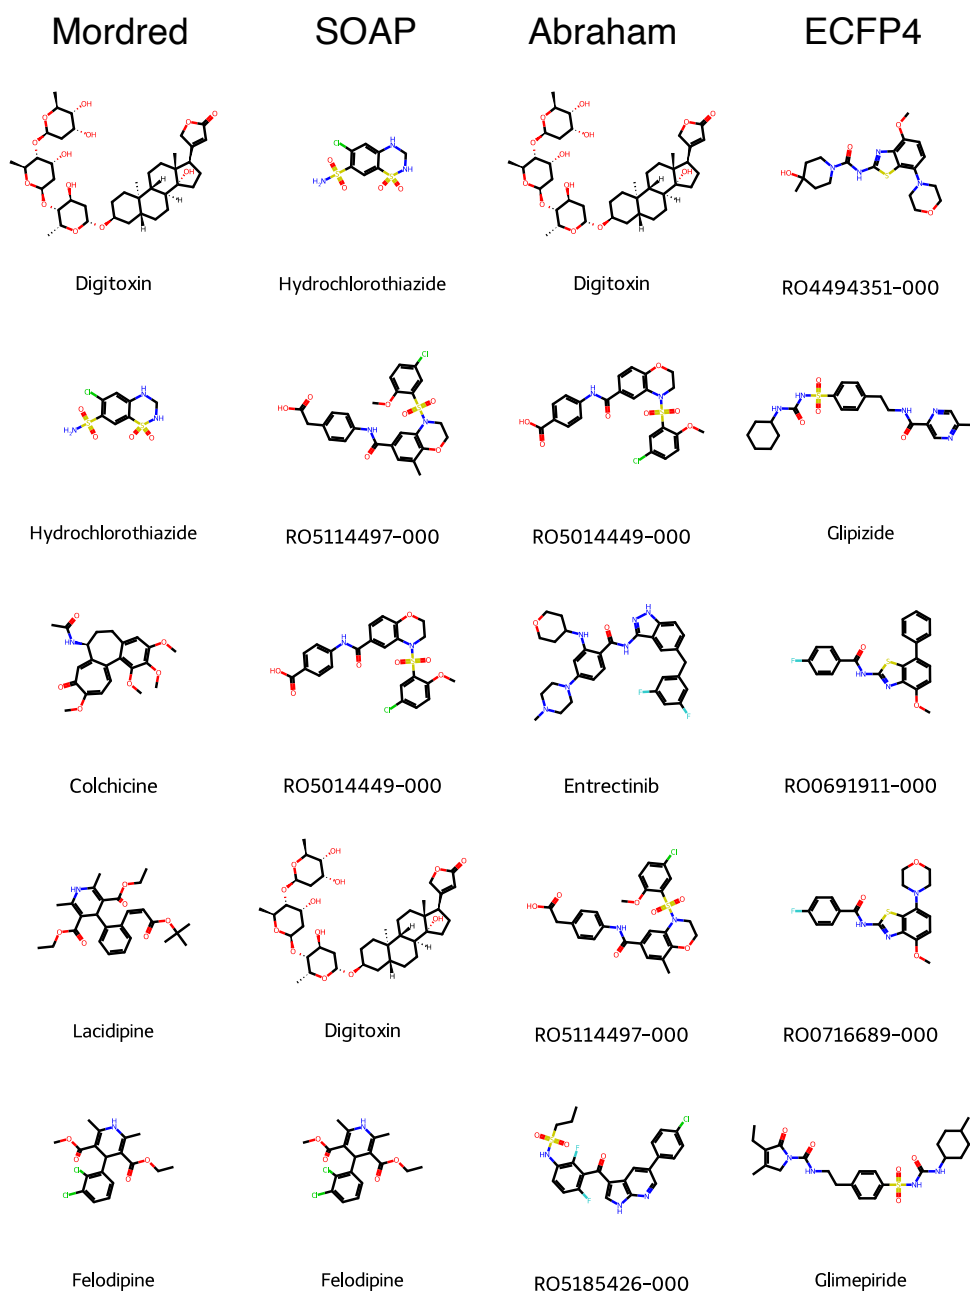

Figure S1: Illustration of the five molecules with the highest uncertainty in the test set for each model/descriptor set.

## References

- (S1) Ertl, P. *Molecular Drug Properties*; John Wiley & Sons, Ltd, 2007; Chapter 5, pp 111–126.
- (S2) Hall, L. H.; Kier, L. B. The E-State as the Basis for Molecular Structure Space Definition and Structure Similarity. *Journal of Chemical Information and Computer Sciences* **2000**, *40*, 784–791.
- (S3) Moriwaki, H.; Tian, Y.-S.; Kawashita, N.; Takagi, T. Mordred: a molecular descriptor calculator. *Journal of Cheminformatics* **2018**, *10*.
- (S4) Pearlman, R. S.; Smith, K. M. Metric Validation and the Receptor-Relevant Subspace Concept. *Journal of Chemical Information and Computer Sciences* **1999**, *39*, 28–35.
- (S5) Todeschini, R.; Consonni, V. *Handbook of Molecular Descriptors*; Wiley, 2000.
- (S6) Gasteiger, J.; Marsili, M. Iterative partial equalization of orbital electronegativity—a rapid access to atomic charges. *Tetrahedron* **1980**, *36*, 3219–3228.
- (S7) Labute, P. A widely applicable set of descriptors. *Journal of Molecular Graphics and Modelling* **2000**, *18*, 464–477.
